# Supplementary material for: Trends in publication of evidence-based Traditional Iranian medicine in endocrinology and metabolic disorders
Source: PubMed Central journal article supplement (PMC7968339; doi:10.1186/2251-6581-12-49), 2013-12-19

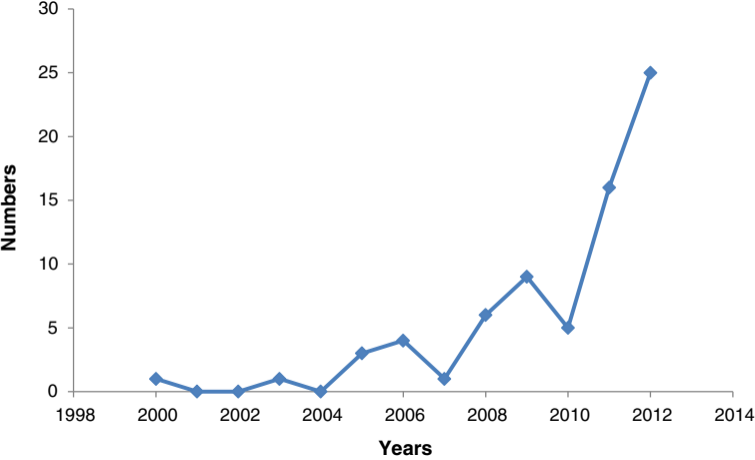

Supplement: 40200_2013_181_MOESM1_ESM.pdf [file 40200_2013_181_MOESM1_ESM.pdf]
